# Supplementary material
Source: PubMed Central journal article supplement (PMC6891163)
Supplement: NIHMS1537968-supplement-1.pdf [file NIHMS1537968-supplement-1.pdf]

## **Supplementary Material and Methods**

### **CD19 shRNA knockdown**

pLKO.1 vectors with two different shRNA inserts specific for CD19 (MISSION shRNA, Sigma) as well as empty vector were packed in HEK293T cells into lentiviral particles, which were concentrated using PEG-6000. On day 1, 10e6 Jeko-1 cells were transduced with 50 ul 100x concentrated virus in the presence of 5 µg/ml polybrene for 24h. On day 5, transduction efficiency was analyzed with flow cytometry, and selection with 0.4 µg/ml puromycin was initiated. After 11 days of selection, CD19 and CD79b expression was analyzed again using flow cytometry and SYBR green qPCR.

### **SYBR green qPCR**

RNA was isolated from jeko-1 cells with RNeasy minikit (Qiagen). cDNA was synthesized using Maxima H Minus Reverse Transcriptase (Thermo Scientific). QuantiTect SYBR green PCR kit (Qiagen) was used for qPCR, which was run on a StepOnePlus Real Time PCR System (Applied Biosystems). CD19 forward primer: 5'AGGGAGATAACGCTGTGCTG-3', CD19 reverse primer: 5'-AGAAGGGTTTAAGCGGGGAC-3', PUM1 forward primer: 5'-GTACTGTCCCCACGATCGGA-3, PUM1 reverse primer: 5'-TGCATCCCTTGGGCCAAATC-3'.

# Supplementary figure 1

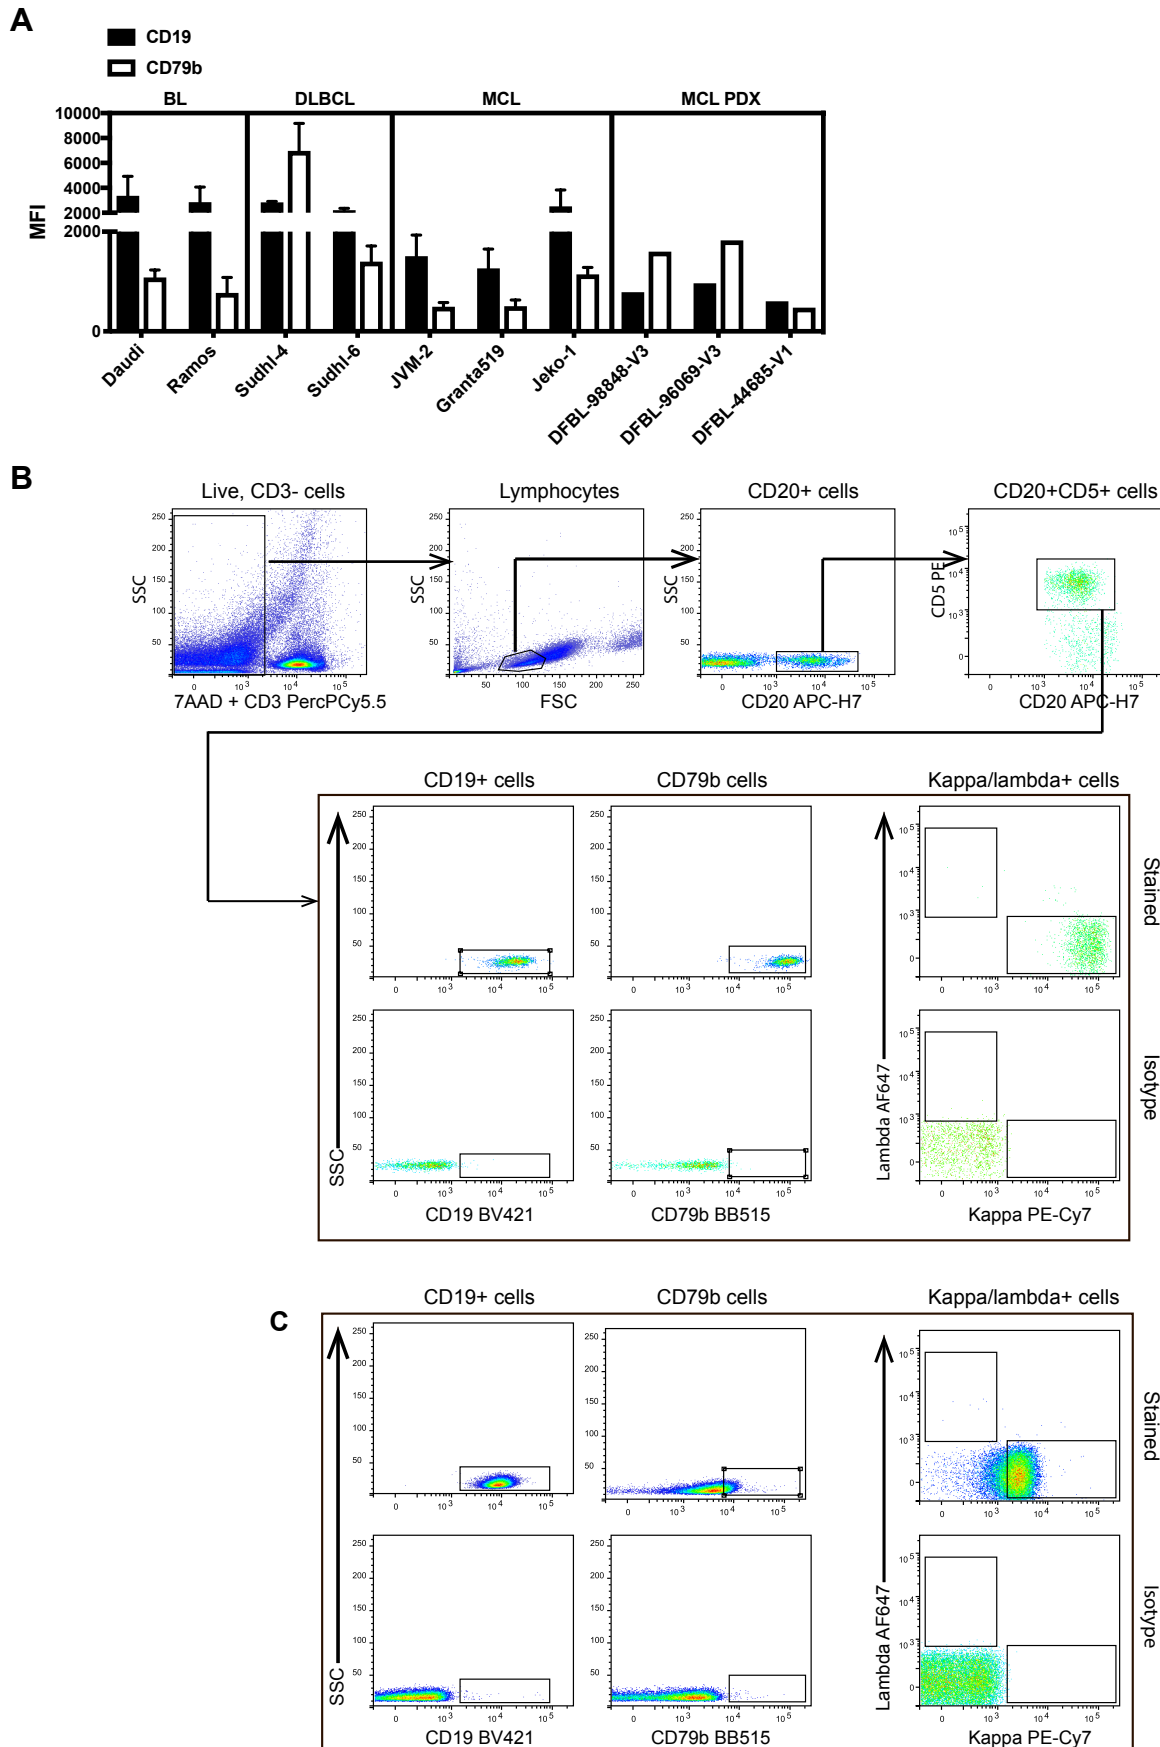

Supplementary figure 1: CD79b and CD19 expression on human lymphomas

(A) Mean fluorescent intensity (MFI), determined by flow cytometry, of CD79b and CD19 surface expression on human tumor B cell lines or mantle cell lymphoma patient derived xenografts. MM: multiple myeloma, BL: Burkitt's lymphoma, DLBCL: diffuse large B cell lymphoma, MCL: mantle cell lymphoma. Peripheral blood mononuclear cells from 6 patients diagnosed with MCL were evaluated for CD19 and CD79b expression using flow cytometry. Malignant B cells were gated as CD3-CD20+CD5+. (B) CD19 and CD79b surface staining on one MCL donor with bright CD79b expression. The CD3-CD20+CD5+CD19+CD79b+ cells are clearly defined as a kappa+ population. (C) CD19 and CD79b surface staining on one MCL donor with dim CD79b expression. The CD3-CD20+CD5+CD19+CD79b+ cells are not clearly defined as either kappa or lambda+. Dim expression of CD79b could not be clearly resolved by the chosen fluorochrome thereby giving the impression of being CD79b negative.

Supplementary Figure 2

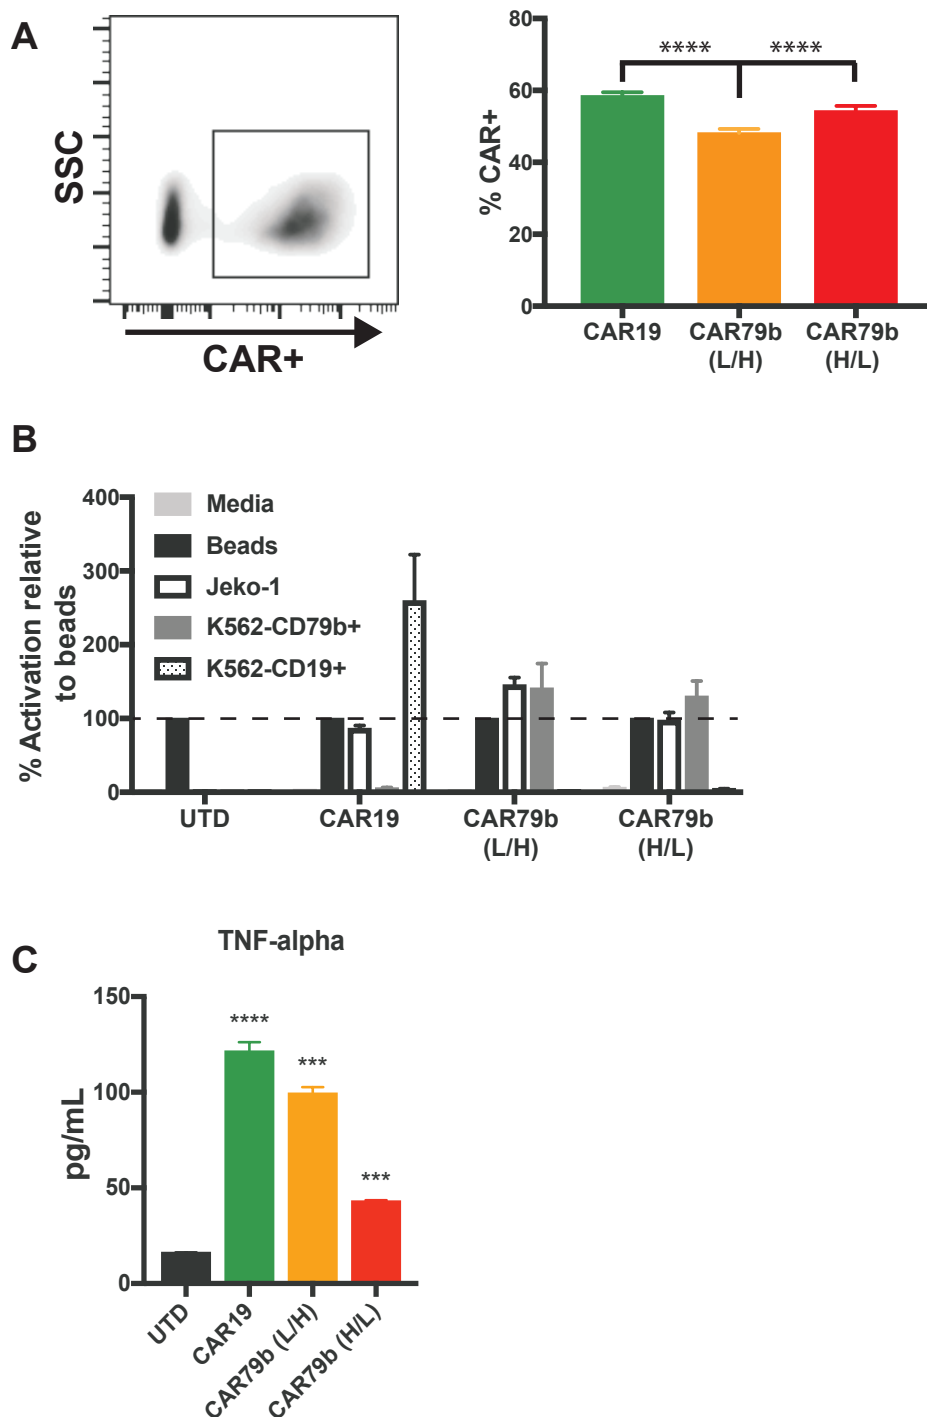

Supplementary figure 2: Transduction efficiency and in vitro activation of CAR T cells

(A) Representative flow plot of human T cells transduced with a chimeric antigen receptor, and transduction efficiency after 10 days of culture (n=3 healthy donors, mean+SEM shown). (B) Activation of Jurkat reporter (NFAT-Luc) T cells, based on luciferase activity, transduced with different CAR constructs and co-cultured overnight with target cells, anti-CD3/CD28 Dynabeads as positive control, or media as negative control (n=3, mean+SEM shown). (C) TNF $\alpha$  production measured by Luminex in collected cell culture supernatants after overnight co-culture of CAR T cells and target cells at a 1:1 ratio (n=2 healthy donors, mean+SEM shown, \*\*\*<0.001, \*\*\*\*<0.0001 by Anova).

## Supplementary figure 3

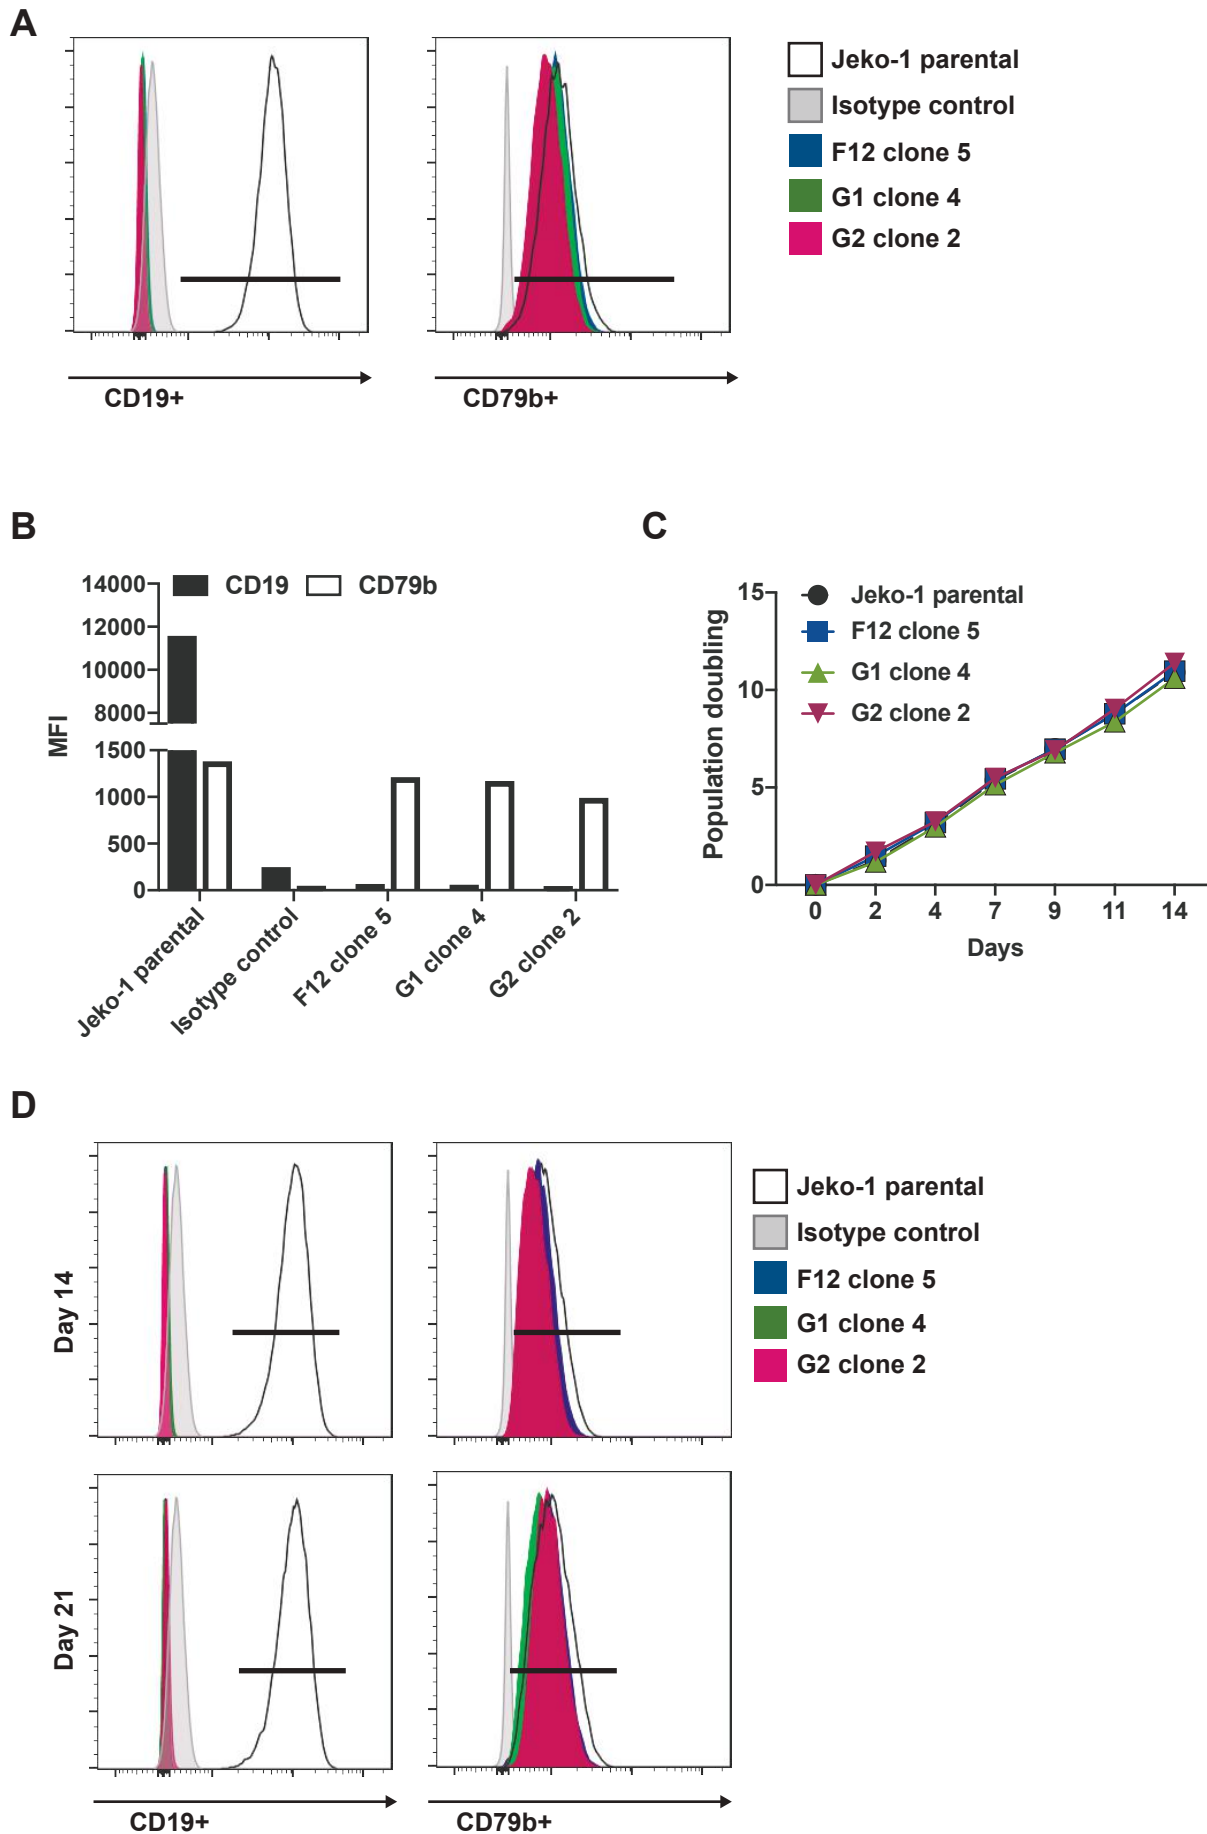

Supplementary figure 3: Loss CD19 does not reduce CD79b surface expression

(A) Representative histograms showing CD19 and CD79b surface expression, determined by flow cytometry, on parental Jeko-1 cells and Jeko-1 cells with CRISPR/Cas9 mediated knockout of CD19. (B) Mean fluorescent intensity (MFI) of surface CD19 and CD79b on parental Jeko-1 cells and CD19 knockout cell lines. (C) Comparison of long-term growth of parental Jeko-1 and CD19 negative Jeko-1 clones. (D) Representative histograms of surface CD19 and CD79b expression, determined by flow cytometry, on parental Jeko-1 or CD19 negative Jeko-1 clones at day 14 and 21 of culturing.

## Supplementary figure 4

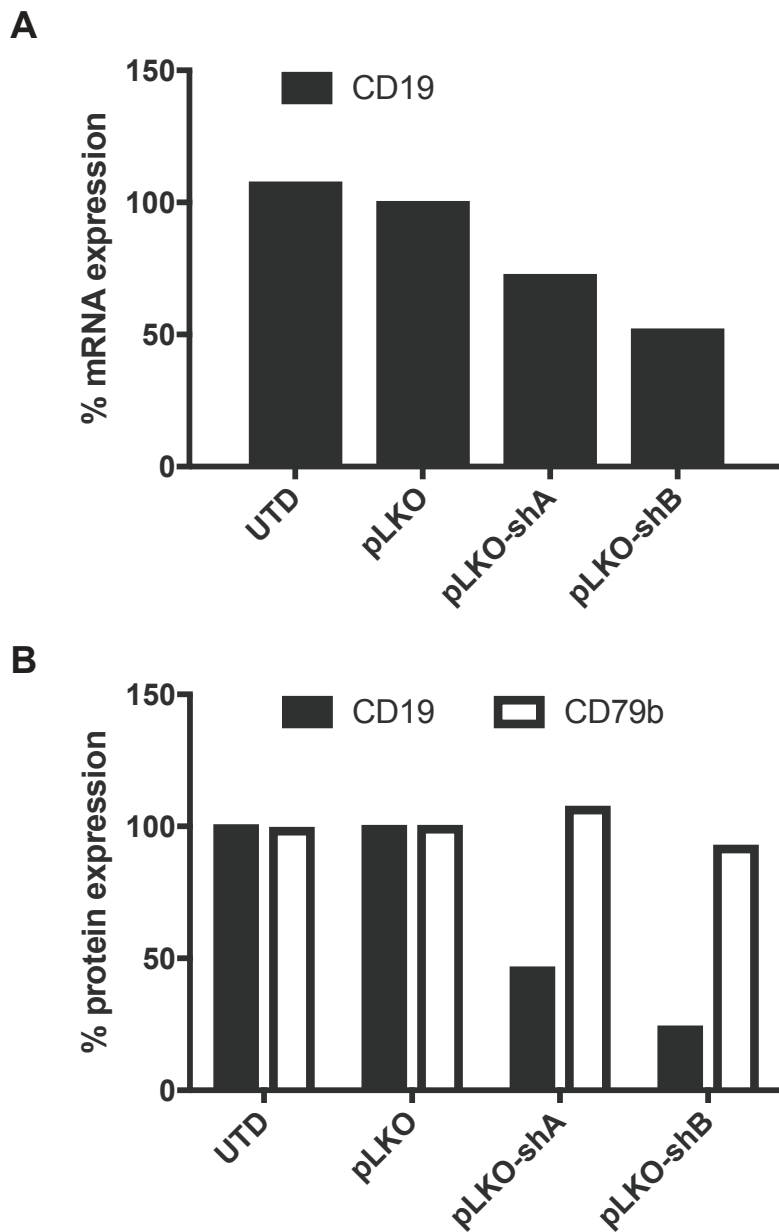

Supplementary figure 4: shRNA knockdown of CD19 does not reduce CD79b surface expression

(A) Efficient knockdown of CD19 was achieved in Jeko-1 cells with two different CD19 directed shRNAs. (B) Flow cytometric analysis of CD19 and CD79b surface expression on Jeko-1 cells after shRNA mediated CD19 knockdown. The graphs are representative of two independent experiments (one shown).

Supplementary figure 5

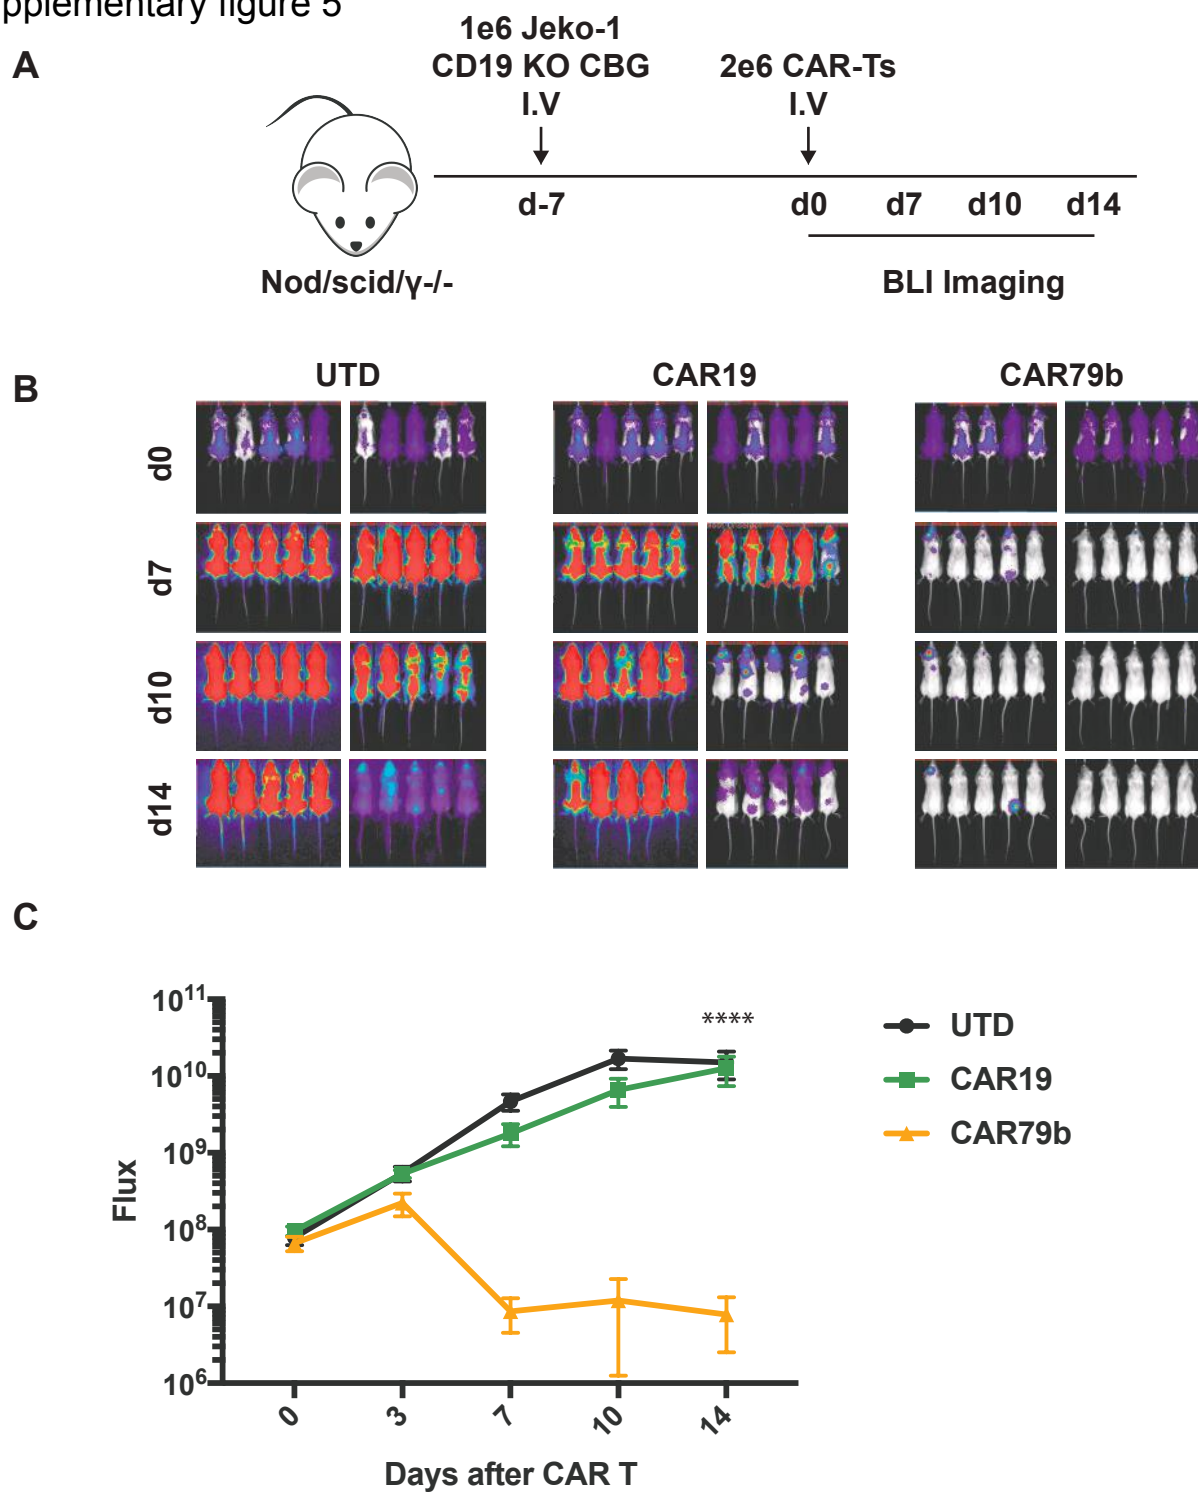

Supplementary figure 5: CD79b CAR T cells eradicate a CD19 negative MCL xenograft tumor

(A) Schematic illustration of the in vivo experiment: NSG mice received an IV injection of a total of 1e6 Jeko-1 CD19 negative CBG-GFP (F12 clone 5) tumor cells. Tumor engraftment was established with BLI imaging. At day 0, mice were grouped according to BLI expression and given a single dose of 2e6 CAR19, CAR79b (L/H) or UTD controls cells. (B) Representative bioluminescent images of CD19 negative tumor growth over time. (C) The average radiance [p/s] FLUX, of whole mice in different treatment groups over time (n=10 mice pr. group, mean±SEM shown, two-way ANOVA). Graphs are based on experiments with T cells from two different healthy donors.

Supplementary figure 6

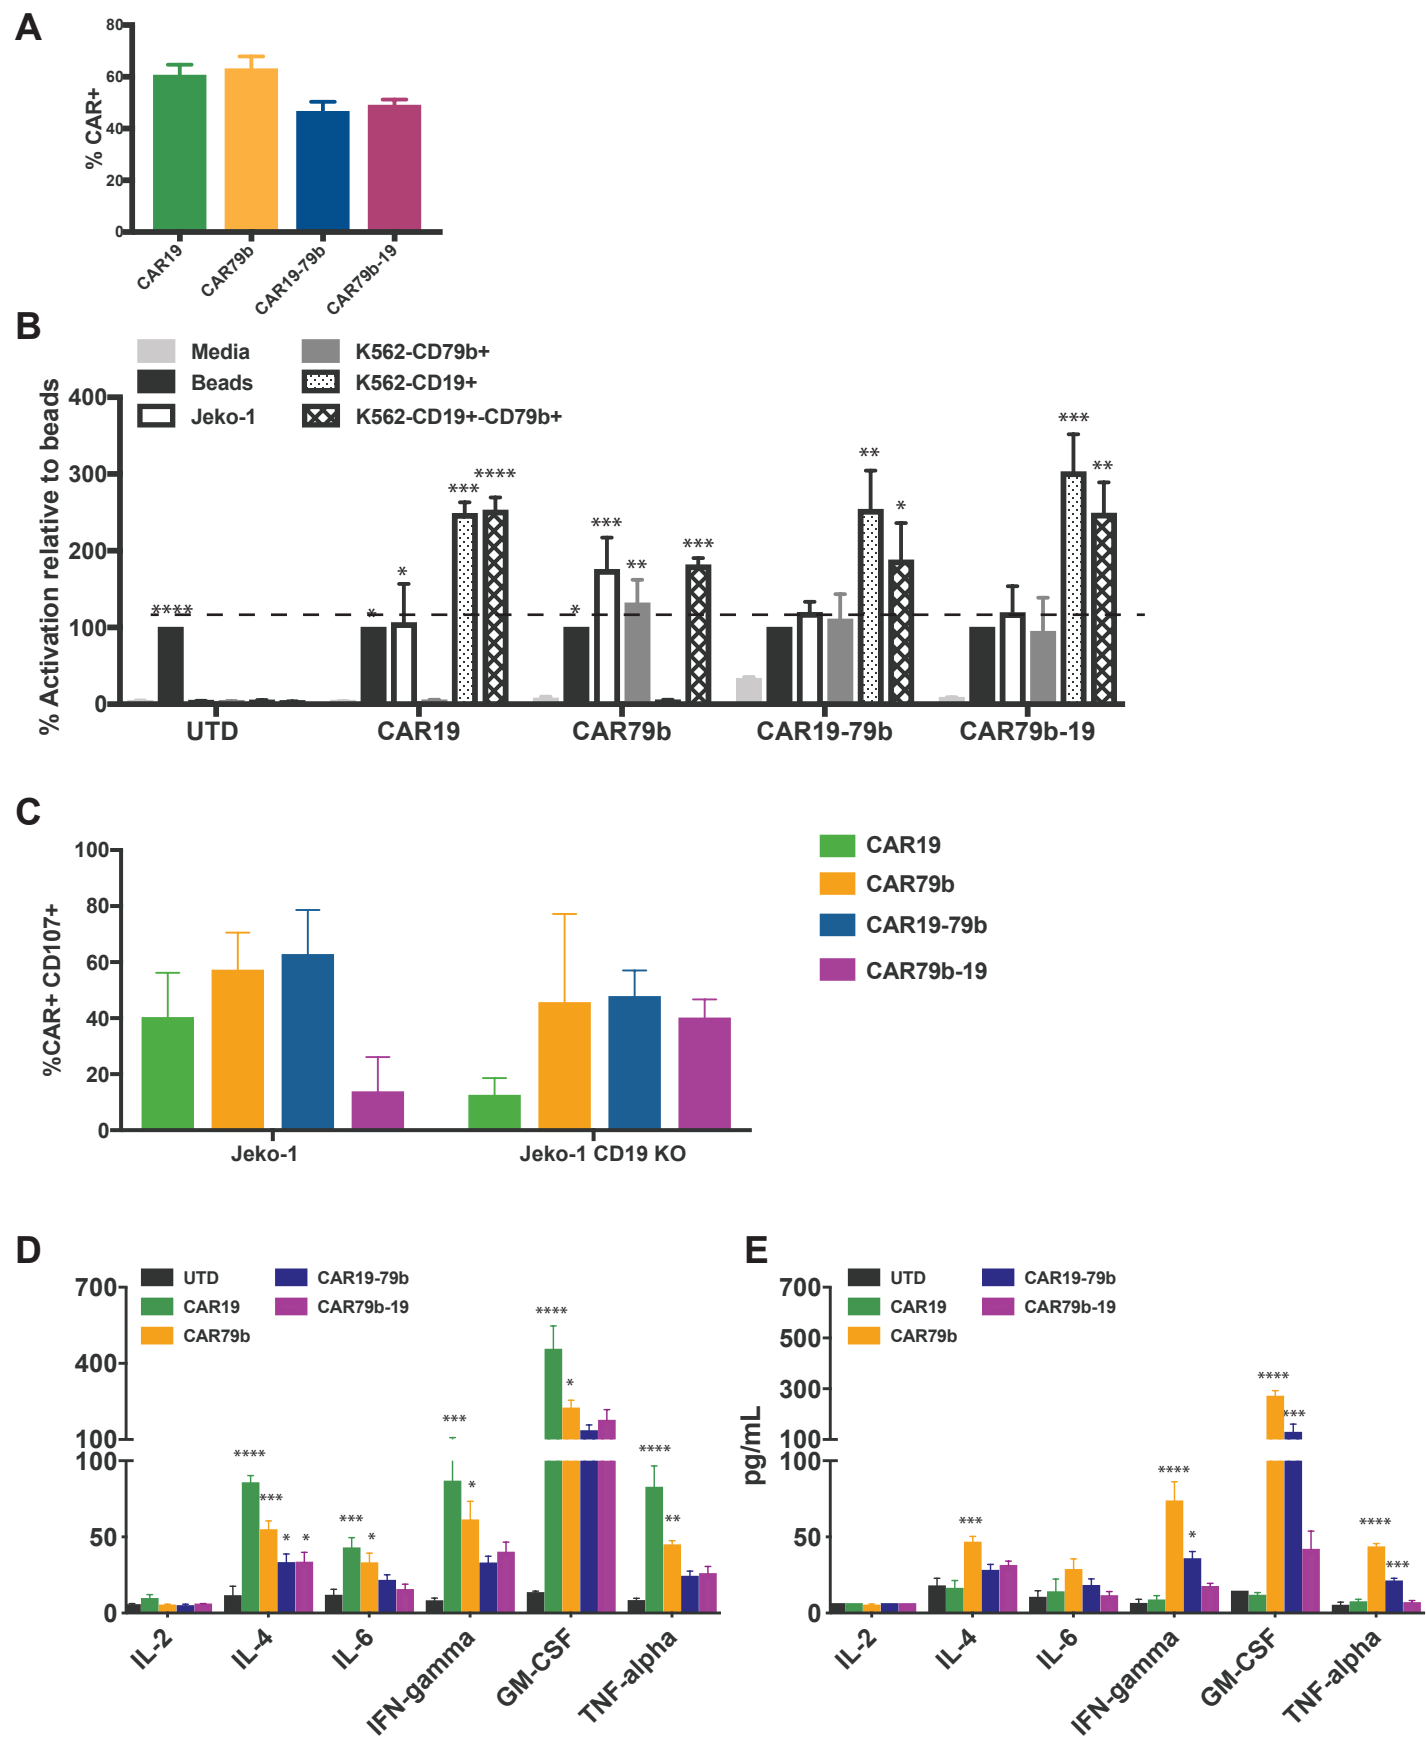

Supplementary figure 6: Transduction efficiency and In vitro efficacy of tandem CAR T cells

(A) Tandem CAR transduction efficiency of human T cells across multiple donors (n=3, healthy donors, mean+SEM shown, ANOVA). (B) Luciferase activity of Jurkat reporter (NFAT-Luc) T cells, transduced with different CAR constructs, after overnight co-culture with target cells, anti-CD3/CD28 Dynabeads as positive control, or media as negative control (n=3 mean+SEM, ANOVA compared to UTD, \* $<0.05$ , \*\* $<0.01$ , \*\*\* $<0.001$ , \*\*\*\* $<0.0001$ ). (B) Degranulation of CAR T cells in response to parental Jeko-1 or CD19 negative Jeko-1 (F12 clone 5) cells established by CRISPR/Cas9-mediated knockout of CD19. Effector cytokine production measured in cell culture supernatants of CAR T cells stimulated with (C) parental Jeko-1 or (D) CD19 negative (F12 clone 5) Jeko-1 cells. Cytokine analysis was performed using a Luminex array (n=3 healthy donors, mean+SEM shown, \* $<0.05$ , \*\* $<0.01$ , \*\*\* $<0.001$ , \*\*\*\* $<0.0001$ , ANOVA of each condition compared to UTD).

Supplementary figure 7

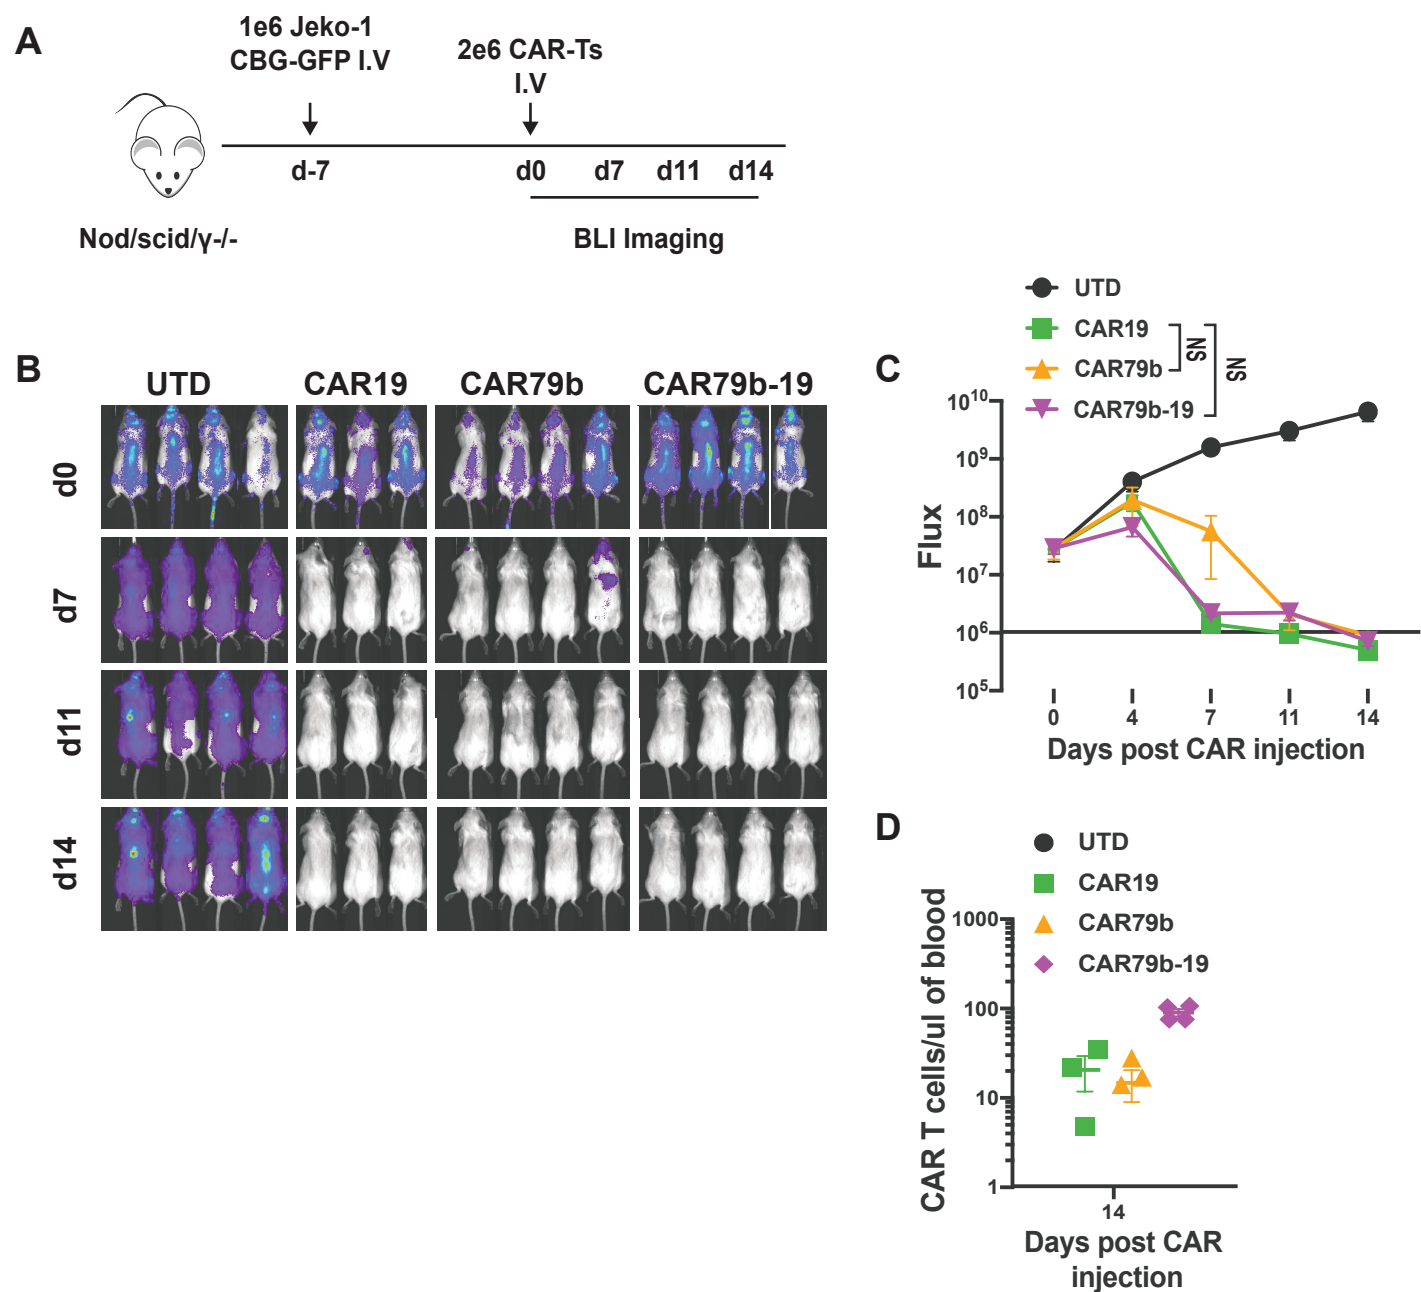

Supplementary figure 7: CD79b and CAR79b-19 CAR T cells clear MCL CD79b+CD19+ “upfront” tumors in vivo (A) Schematic illustration of the experimental design indicating tumor cells, timeline, dose, and imaging time points. Mice were grouped according to tumor engraftment and before injection with a single dose of 2e6 CAR19, CAR79b, CAR79b-19 or untransduced control T (UTD) cells. (B) Representative bioluminescent images of tumor growth over time. (C) The average radiance [p/s/cm<sup>2</sup>/sr] FLUX, of whole mice in different treatment groups over time (n=3-4 mice per group, mean±SEM shown, p=NS, two-way ANOVA). (D) Presence of CD3+mCherry+ cells in peripheral blood at day 14 post CAR T cell injection (n=3-4 mice per group, mean±SEM shown). Graphs are representative of T cells from one healthy donor.
